# Supplementary material
Source: PubMed Central journal article supplement (PMC3064179)
Supplement: supp_M110.194365_jbc.M110.194365-1.pdf [file supp_M110.194365_jbc.M110.194365-1.pdf]

## SUPPLEMENTARY FIGURES

Fig. S1. DIC imaging analysis of GUVs obtained from *E. coli* inner membranes (see Fig. 1).

Fig. S2. Spatial distribution of Alexa 647 labelled FtsZ inside GUIMVs formed in the presence of 0.1 mM GDP. Panel A: DIC image. Panel B: stack projection of the whole cross-sectional images. Panel C: Sequential cross-sectional images taken every 1  $\mu\text{m}$ . The image series begins on the outer wall of the GUV and progressively moves in the Z-axis towards the opposite side of the vesicle through the GUV equator. The scale bar marks 10  $\mu\text{m}$ .

Fig. S3. Spatial distribution of Alexa 647 labelled FtsZ inside GUIMVs formed in the presence of 0.5 mM caged GTP. Panel A: DIC image. Panel B: stack projection of the whole cross-sectional images. Panel C: Sequential cross-sectional images (taken every 1  $\mu\text{m}$ ) of Alexa 647 labelled FtsZ polymers inside GUIMVs. The image series begins on the outer wall of the GUV and progressively moves in the Z-axis towards the opposite side of the vesicle through the GUV equator. The scale bar marks 10  $\mu\text{m}$ .

Fig. S4. Spatial localization of Alexa 647 labelled FtsA inside GUIMVs in the absence of FtsZ. Panel A: DIC image. Panel B: stack projection of the whole cross-sectional images. Panel C: Sequential cross-sectional images taken every 1  $\mu\text{m}$ . Each section represents a 1micron shift and the whole collection of images comprises the total volume of the spherical vesicle. The scale bar marks 10  $\mu\text{m}$ .

Fig. S5. Image analysis of Ficoll-induced (non labelled) FtsZ polymer bundles in the presence of Alexa 647 labelled FtsA. Panel A: DIC image. Panel B: Stack projection of cross-sectional images.

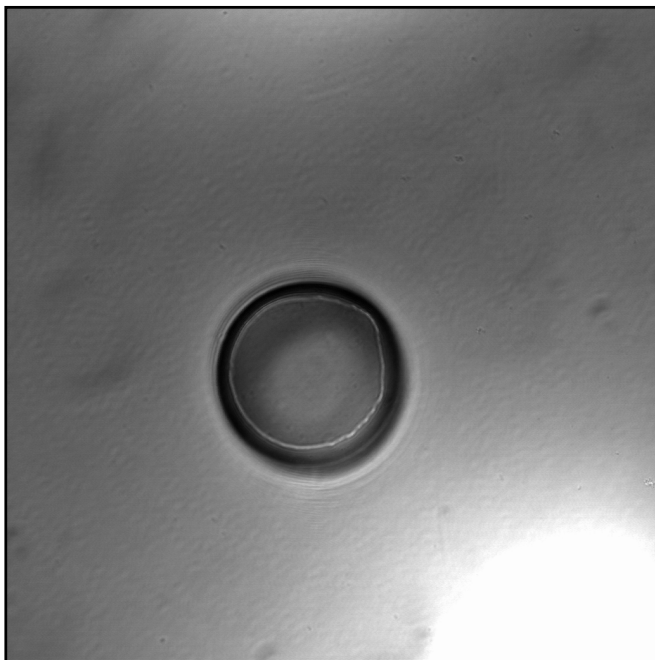

**Figure S1**

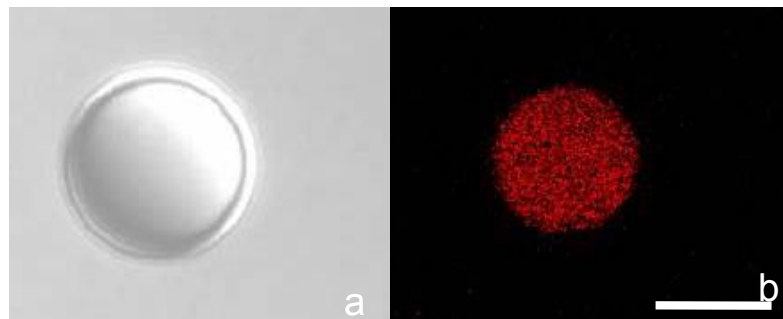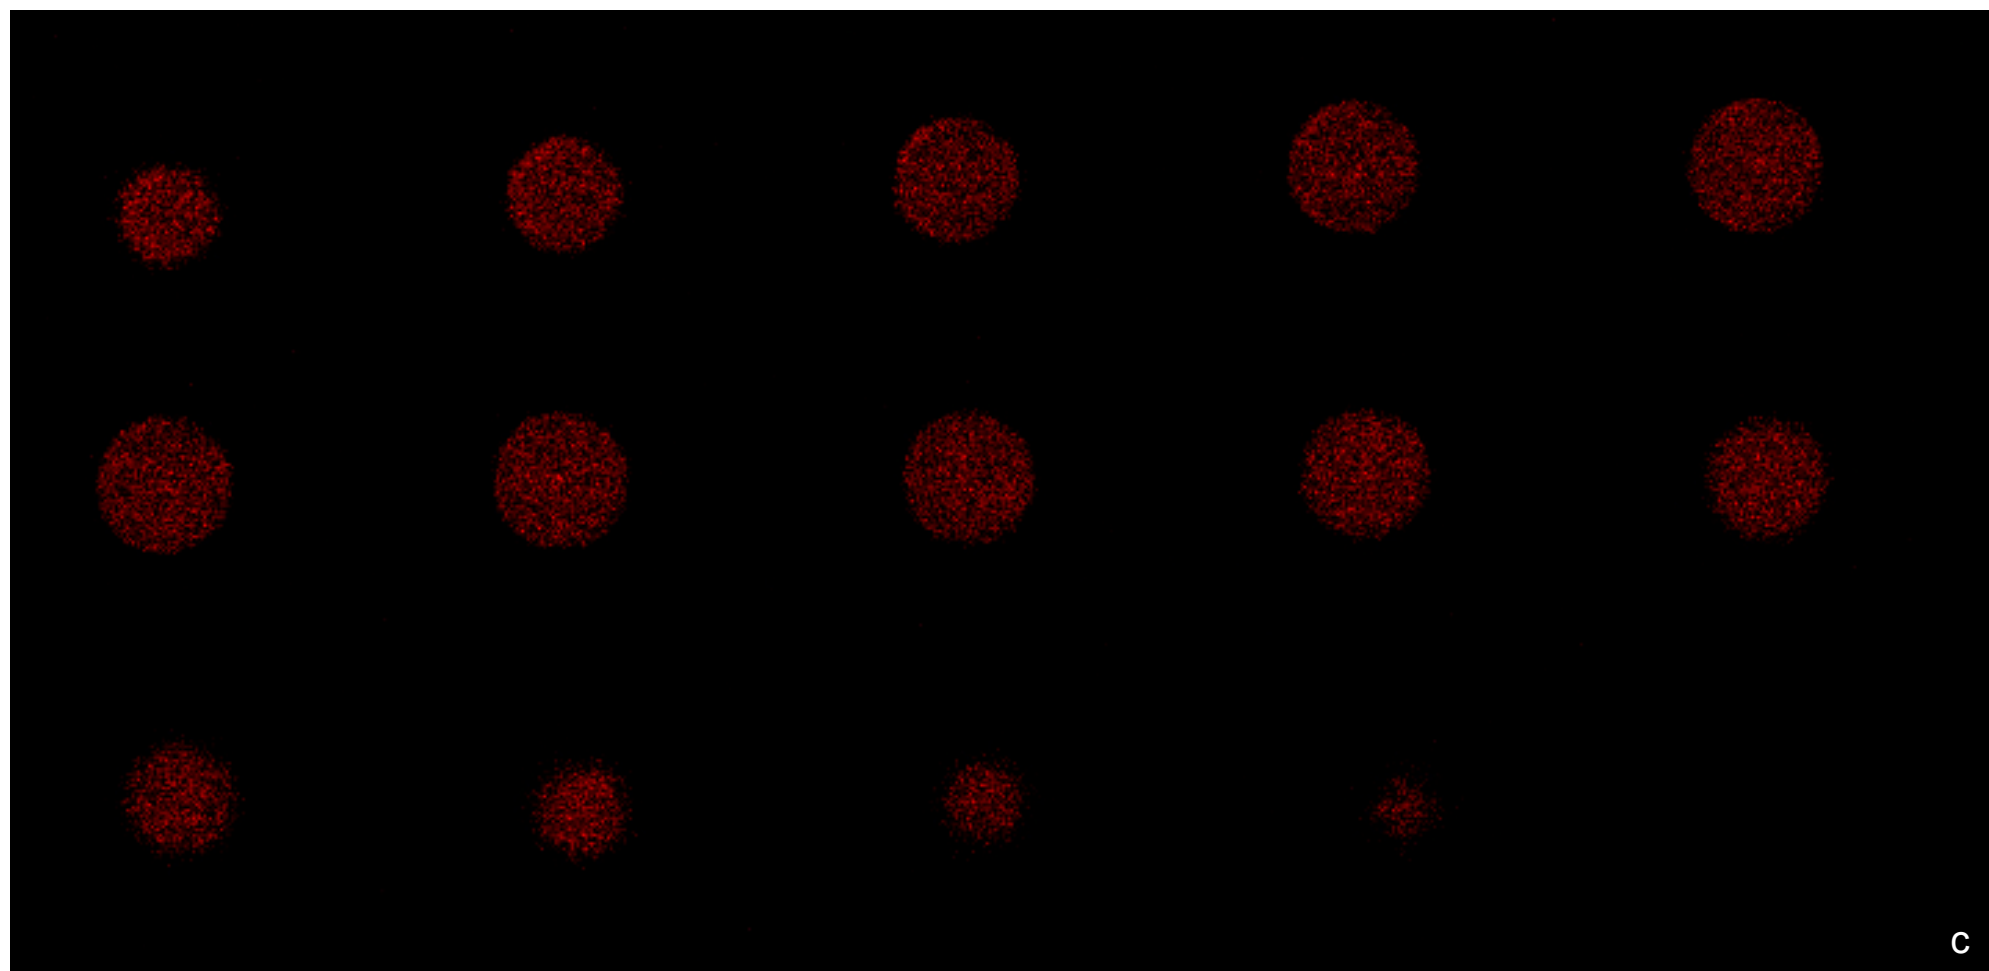

**Figure S2**

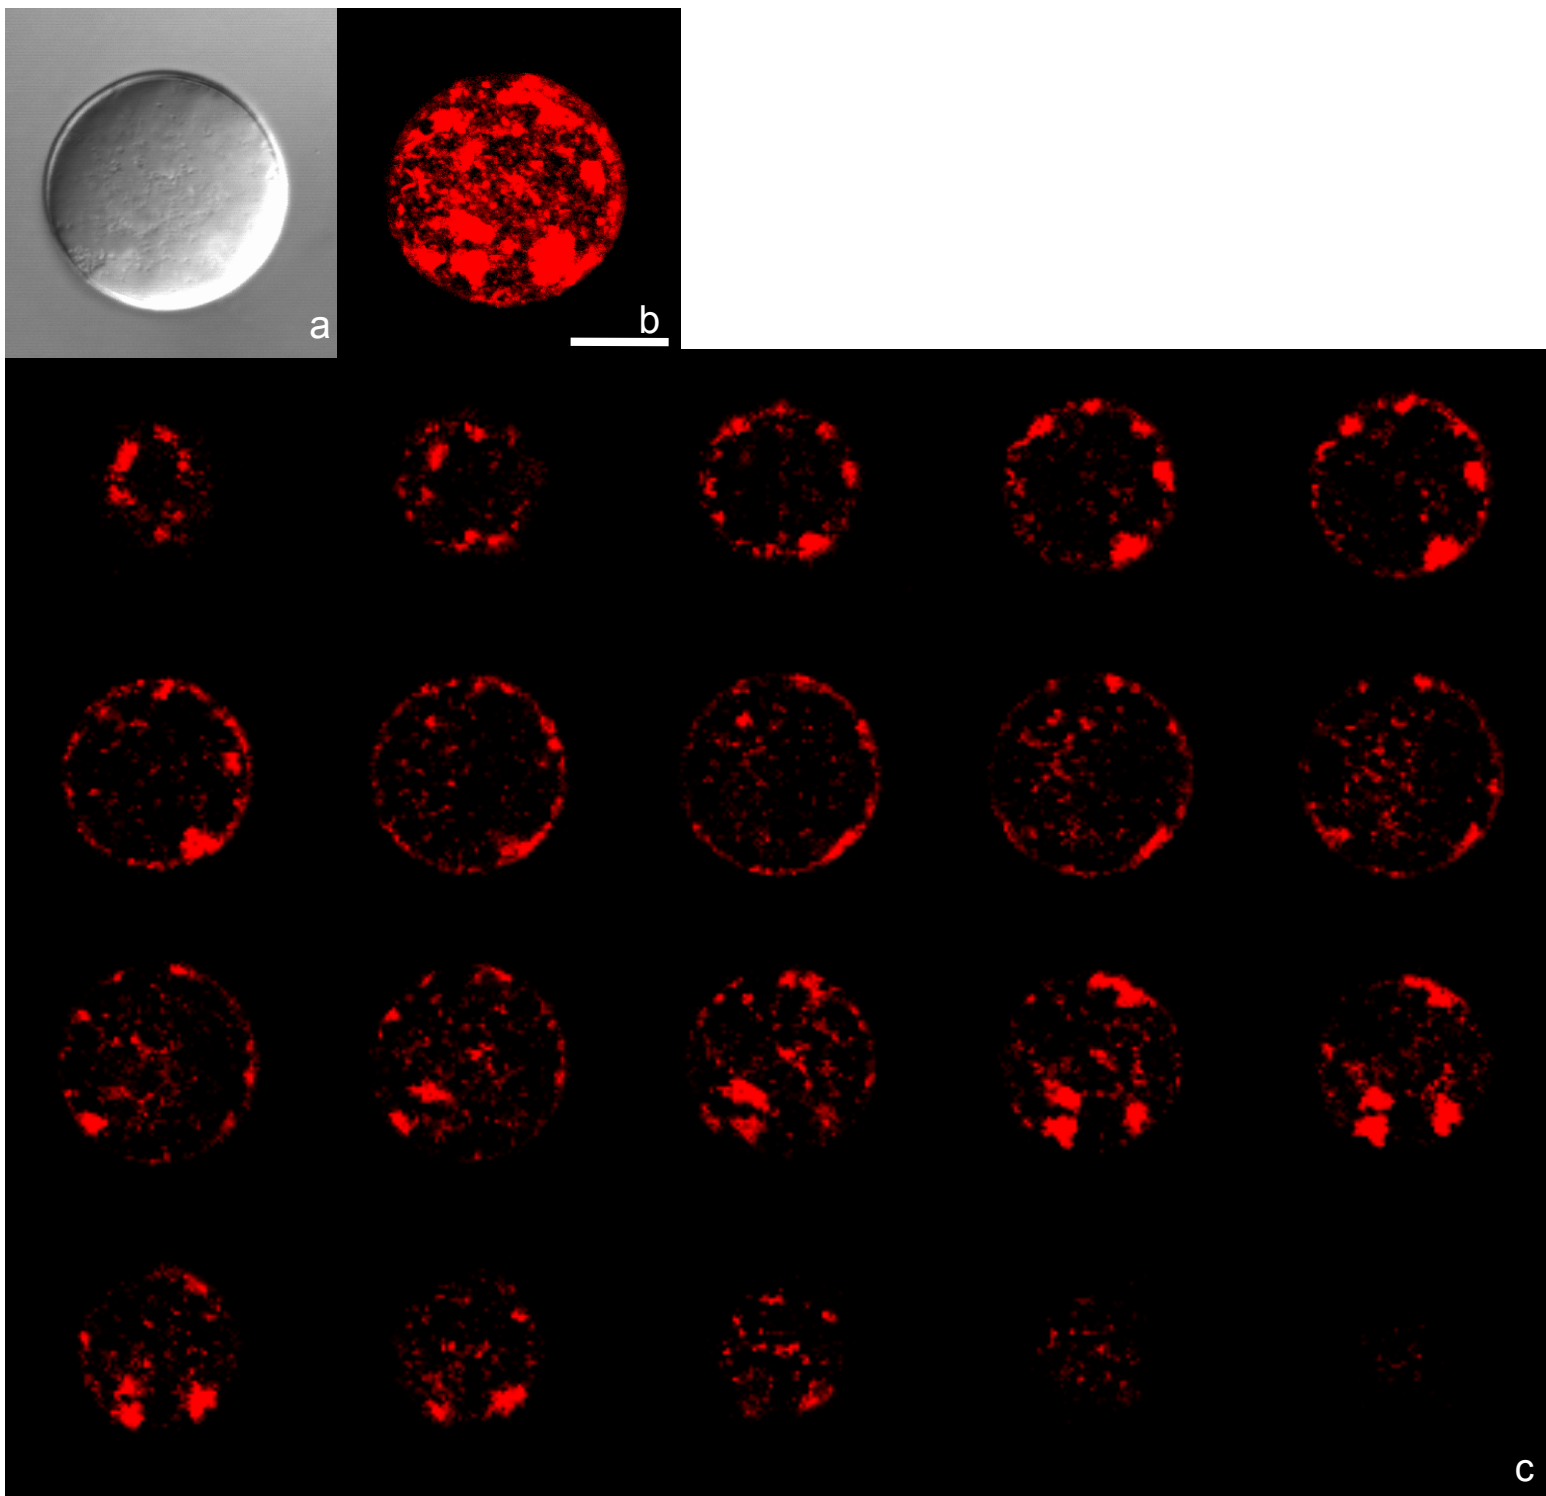

Figure S3

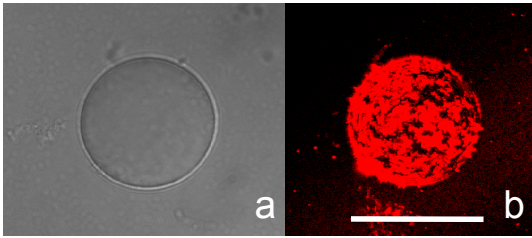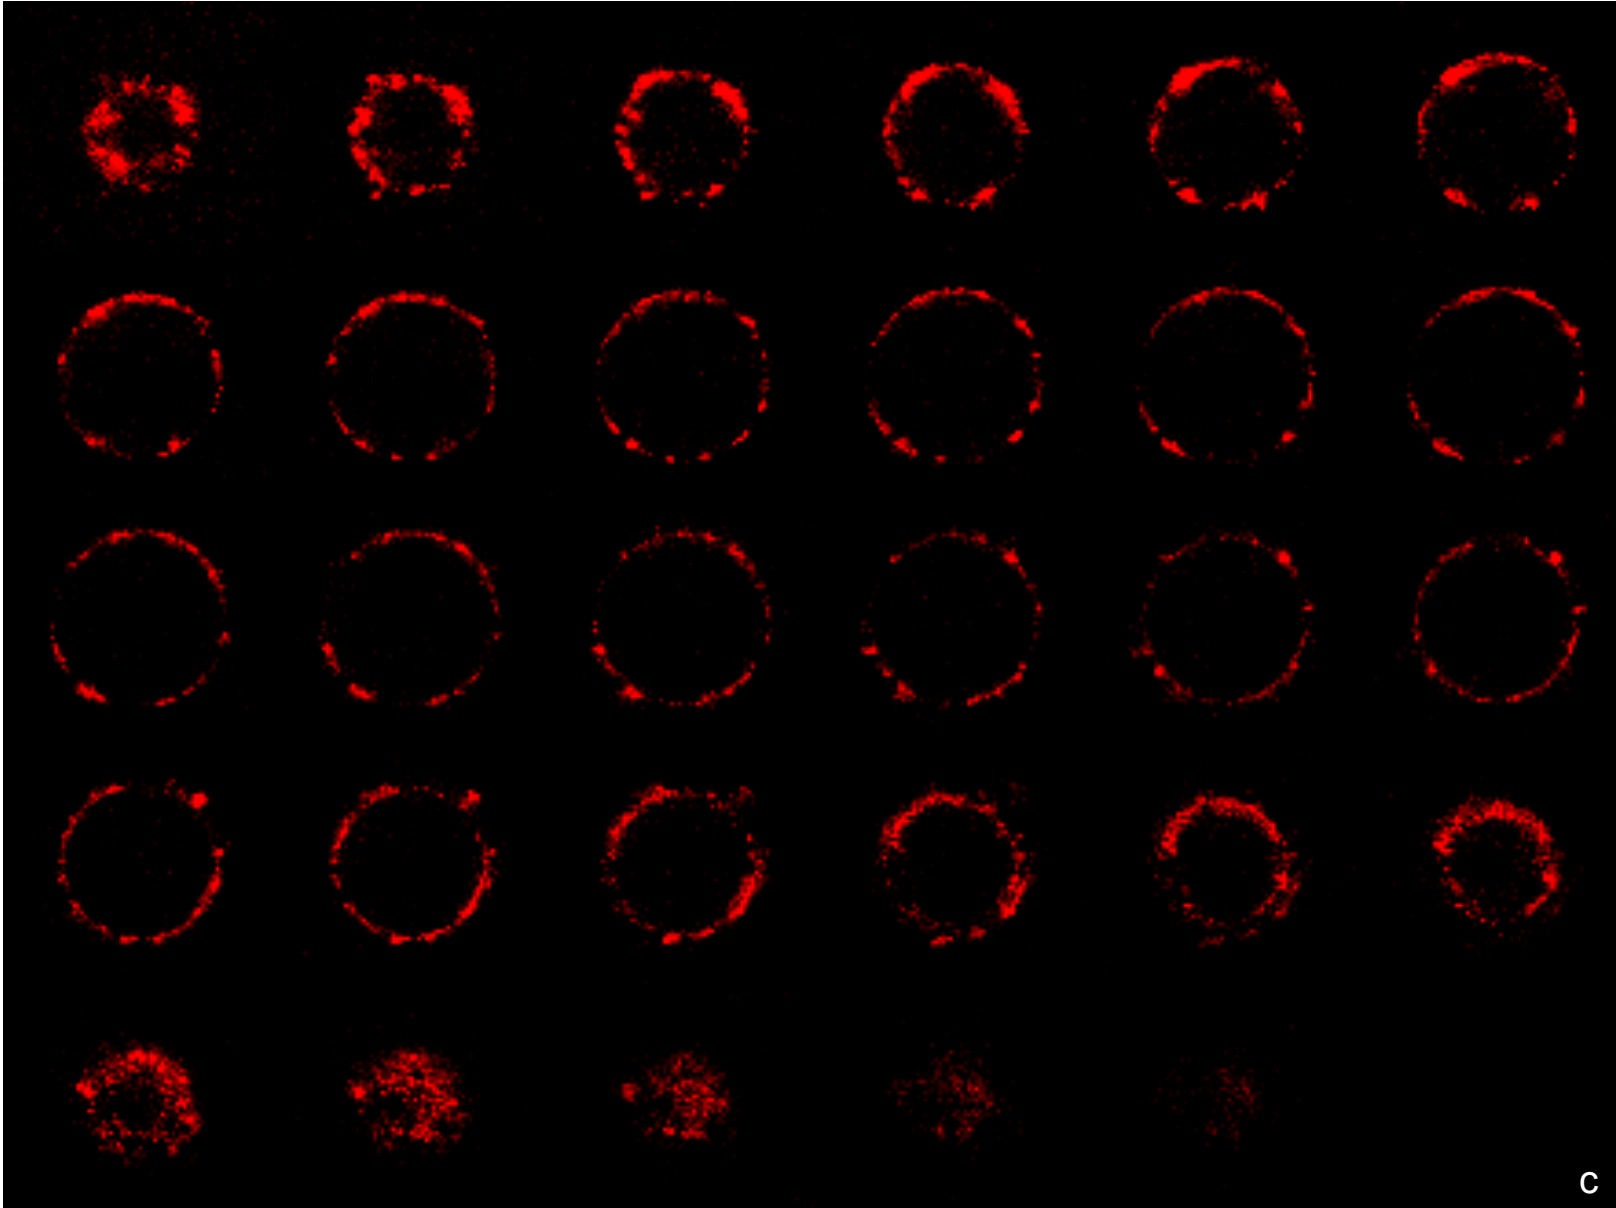

Figure S4

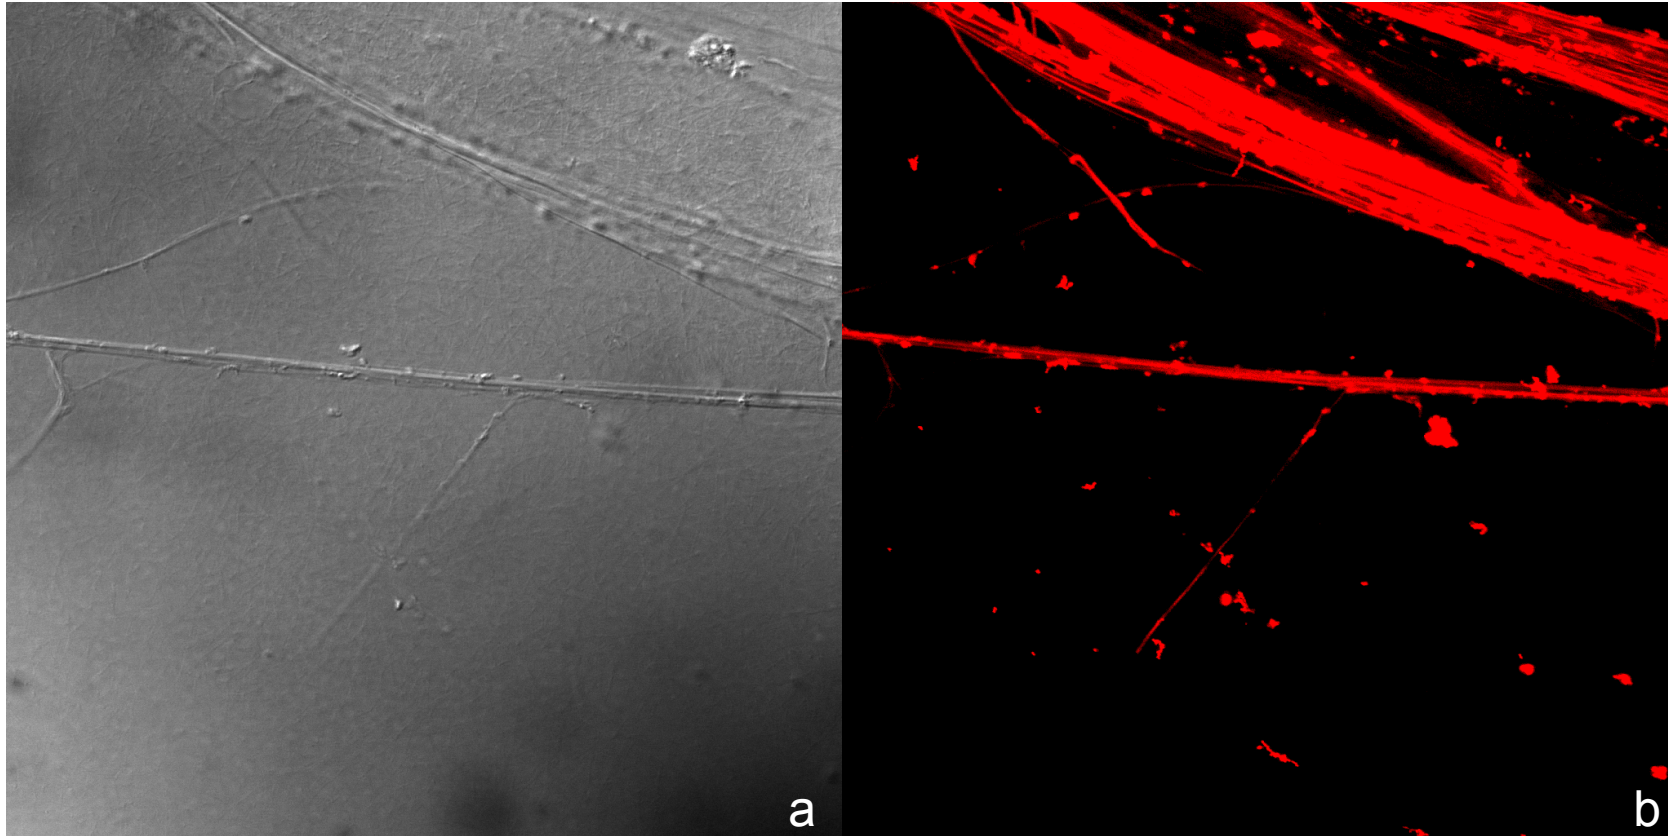

**Figure S5**
